# Supplementary material
Source: publisher figshare collection journal article supplement (https://sage.figshare.com/ndownloader/files/15279356)
Supplement: Supplementary file 1 [file 15279356]

## ONLINE APPENDIX

### Appendix A: Distribution of Protests over the Study Window

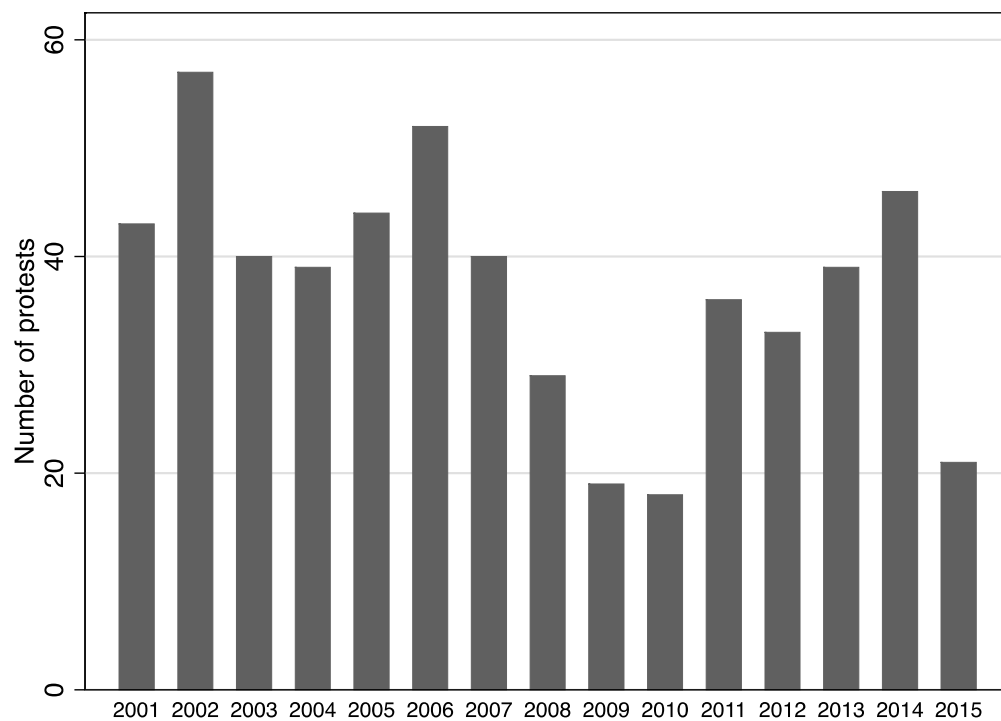

## Appendix B: Distribution of Protest Issue Liberalism and Illustrative Examples

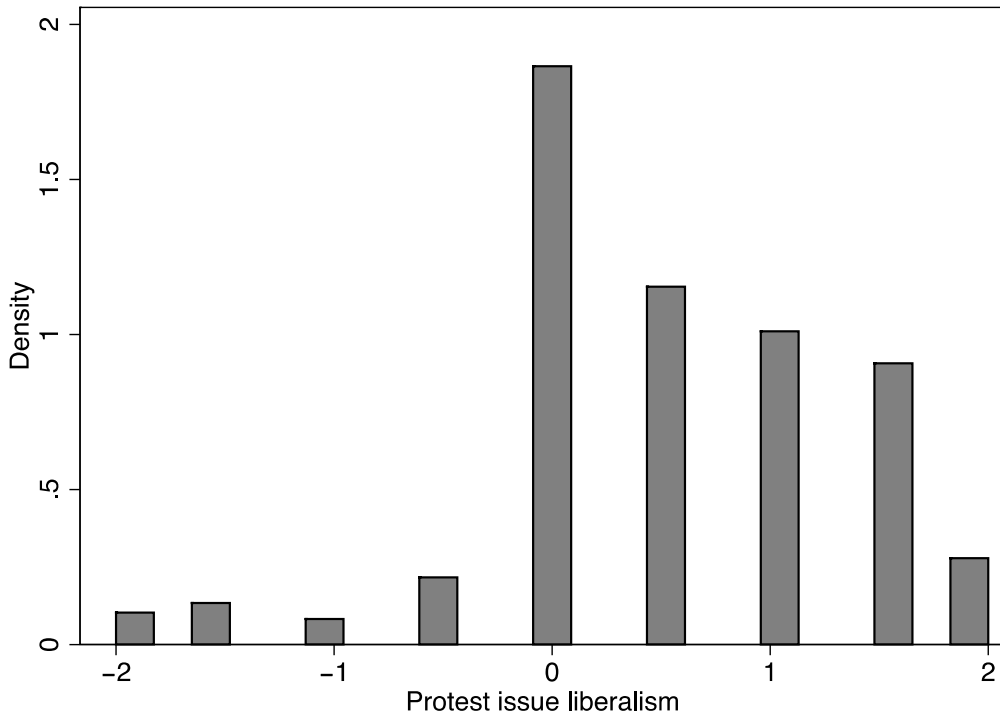

| Targeted firm    | Activists' demands                                                                      | Year | Protest issue ideology |
|------------------|-----------------------------------------------------------------------------------------|------|------------------------|
| Walmart          | Increase frontline workers' pay                                                         | 2012 | Liberal                |
| Coca-Cola        | Provide healthcare benefits to workers                                                  | 2015 | Liberal                |
| Ford Motors      | Reduce carbon emissions                                                                 | 2013 | Liberal                |
| American Express | Withdraw increased fee on cards                                                         | 2002 | Neutral                |
| Guidant Corp     | Release data on product defects                                                         | 2005 | Neutral                |
| Medtronic        | Address cybersecurity vulnerabilities of medical devices                                | 2007 | Neutral                |
| ConocoPhillips   | Allow employees to carry firearms to work                                               | 2005 | Conservative           |
| Campbell Soups   | Sever ties with an Islamic organization engaged in certification of Halal meat          | 2010 | Conservative           |
| Target           | Stop allowing transgender customers to use bathrooms according to their gender identity | 2015 | Conservative           |

## Appendix C: Probit Models Assessing the Relevance of Ideological Alignment versus Openness Mechanisms

| Variable                                                | Ideological alignment interaction | Protest issue liberalism<br>–0.5 to 0.5<br>(neutral) | Protest issue liberalism < 0<br>(conservative) |
|---------------------------------------------------------|-----------------------------------|------------------------------------------------------|------------------------------------------------|
| Net sales                                               | 0.009<br>(0.009)                  | –0.003<br>(0.024)                                    | –0.037<br>(0.054)                              |
| Return on assets                                        | –1.212<br>(0.795)                 | –1.615<br>(1.269)                                    | –2.175<br>(9.527)                              |
| Firm prestige                                           | –0.126<br>(0.169)                 | 0.152<br>(0.338)                                     | –1.273<br>(1.659)                              |
| Debt-to-equity ratio                                    | 0.048<br>(0.043)                  | 0.125<br>(0.085)                                     | –0.104<br>(0.260)                              |
| Unionized workforce                                     | –0.260+<br>(0.155)                | –0.139<br>(0.320)                                    | –0.220<br>(0.917)                              |
| Ownership concentration                                 | –0.130<br>(0.200)                 | –0.309<br>(0.360)                                    | 0.197<br>(1.168)                               |
| CSR profile                                             | 0.002<br>(0.020)                  | 0.027<br>(0.046)                                     | –0.067<br>(0.153)                              |
| Number of social movement organizations involved        | –0.138*<br>(0.070)                | –0.209<br>(0.147)                                    | –0.855<br>(0.608)                              |
| Protest size                                            | 0.072*<br>(0.033)                 | 0.067<br>(0.062)                                     | 0.165<br>(0.174)                               |
| Media coverage of protest                               | –0.003<br>(0.004)                 | –0.013<br>(0.008)                                    | 0.129+<br>(0.072)                              |
| Institutionalized practice                              | –0.189<br>(0.197)                 | 0.461<br>(0.453)                                     | 6.016+<br>(3.230)                              |
| Secondary stakeholder protest                           | 0.160<br>(0.129)                  | –0.102<br>(0.243)                                    | –3.033+<br>(1.574)                             |
| Prior same-issue protest                                | 0.044<br>(0.039)                  | 0.061<br>(0.077)                                     | –0.394<br>(0.408)                              |
| Workforce concentration                                 | –0.310<br>(0.493)                 | 1.206<br>(0.959)                                     | –9.499<br>(6.395)                              |
| Headquarters city liberalism                            | 0.004<br>(0.003)                  | –0.005<br>(0.006)                                    | –0.089+<br>(0.051)                             |
| Protest issue liberalism                                | –0.044<br>(0.063)                 | –<br>–                                               | –<br>–                                         |
| CEO liberalism                                          | 0.098<br>(0.276)                  | –0.247<br>(0.502)                                    | 0.487<br>(1.633)                               |
| Community liberalism                                    | –0.274**<br>(0.079)               | –0.402**<br>(0.152)                                  | 1.302+<br>(0.783)                              |
| Industry liberalism                                     | 0.029<br>(0.035)                  | 0.050<br>(0.077)                                     | –0.100<br>(0.416)                              |
| Employee spatial proximity                              | 0.314**<br>(0.084)                | 0.472**<br>(0.172)                                   | –0.934<br>(0.669)                              |
| Organizational liberalism                               | 0.836**<br>(0.105)                | 1.004**<br>(0.217)                                   | 1.085*<br>(0.469)                              |
| Organizational liberalism ×<br>Protest issue liberalism | –0.063<br>(0.073)                 |                                                      |                                                |
| Constant                                                | –0.717<br>(0.490)                 | 1.128<br>(0.940)                                     | –6.342<br>(4.694)                              |
| Industry dummies                                        | Y                                 | N                                                    | N                                              |
| N                                                       | 558                               | 181                                                  | 52                                             |

+  $p < .10$ ; \*  $p < .05$ ; \*\*  $p < .01$ .
